# Supplementary material
Source: Elsevier journal article supplement (https://authors.library.caltech.edu/39737/8/mmc2.xls)
Supplement: mmc2 [file mmc2.xls]

## Sheet: Sheet1
					Granodiorite (GD) suite
Sample no.	GH	SB	SA	GM	G1-5	G1-6	G1-7	G1-1	G1-2	G1-3	G1-4
SiO2	65.52	67.29	67.22	67.78	65.98	66.64	67.61	65.32	66.78	64.76	66.89
TiO2	0.505	0.56	0.55	0.545	0.54	0.46	0.46	0.73	0.73	0.76	0.76
Al2O3	16.23	14.98	15.23	14.96	15.93	16.13	15.79	15.96	15.45	15.84	15.09
Fe2O3t	3.452	3.96	3.65	3.665	4.02	3.69	3.47	4.27	4.62	4.56	4.12
MnO	0.058	0.1	0.09	0.1	0.1	0.09	0.1	0.1	0.1	0.1	0.1
MgO	1.29	1.23	1.07	1.02	1.45	1.39	1.17	1.65	1.39	1.69	1.25
CaO	3.23	3.02	2.76	3.165	3.17	3.28	2.75	3.4	3.09	3.39	3.37
Na2O	3.69	3.34	3.56	3.61	3.78	4.04	3.74	3.44	3.32	3.29	3.54
K2O	4.045	3.98	3.65	4.21	3.11	2.91	3.78	3.72	3.26	3.92	3.56
P2O5	0.276	0.21	0.3	0.37	0.35	0.35	0.34	0.45	0.36	0.42	0.34
L.O.I.	1.32	1.23	0.98	0.89	0.93	0.81	0.66	1.22	0.89	1.23	1.12
Total	99.616	99.9	99.06	100.315	99.36	99.79	99.87	100.26	99.99	99.96	100.14
Ba	1457.2	1120.5	1230.6	1096.3	1010.3	1343.6	997.6	1393.2	1523.6	1141.3	1362.3
Cr	58	61.3	57.6	60.2	---	---	---	99.6	100.3	83.7	39.4
Nb	39.208	42.38	44.39	41.54	43.43	40.56	48.92	---	---	---	---
Ni	5.7	6.4	5.2	7.4	7	5	5	7.6	8.7	8.3	9.5
Rb	151.89	189.2	190.5	178.4	207.76	239.98	263.8	258.4	189.2	267.6	207.2
Sr	1234.1	700.741	724.8	938.947	692	797	594	798.4	764	628	989.7
Ta	2.962	3.31	2.86	3.41	3.6	3.3	6.3	---	---	---	---
Th	26.203	24.12	27.69	28.01	23	27.37	23.36	---	---	---	---
U	2.72	3.46	2.98	4.23	4.88	2.06	3.26	---	---	---	---
V	55.8	60.34	45.43	58.79	64.05	59.45	50.33	65.8	56.7	58.4	63.2
Y	13.85	14.7	12.45	15.39	17.93	14.84	17.33	16.2	16.4	17.5	15.7
Zr	217	197	206	178	152	184	204	---	---	---	---
La	94.63	78.23	69.43	65.37	82.36	92.74	78.09	---	---	---	---
Ce	159.21	131.45	120.12	118.94	144.78	158.87	137.94	---	---	---	---
Pr	15.033	12.27	11.25	11.69	14.45	15.4	13.65	---	---	---	---
Nd	48.3	39.81	41.24	40.73	47.85	50.06	45.52	---	---	---	---
Sm	6.771	5.572	7.088	6.105	7.37	7.31	7.03	---	---	---	---
Eu	1.581	1.34	1.51	1.39	1.66	1.61	1.38	---	---	---	---
Gd	4.103	4.01	3.81	3.77	5	4.61	4.63	---	---	---	---
Tb	0.513	0.61	0.58	0.6	0.669	0.576	0.618	---	---	---	---
Dy	2.63	2.91	2.59	2.79	3.7	3.03	3.38	---	---	---	---
Ho	0.478	0.51	0.45	0.53	0.66	0.53	0.6	---	---	---	---
Er	1.292	1.32	1.26	1.35	1.72	1.42	1.67	---	---	---	---
Tm	0.193	0.185	0.179	0.182	0.234	0.202	0.238	---	---	---	---
Yb	1.28	1.04	1.12	1.03	1.402	1.283	1.531	---	---	---	---
Lu	0.184	0.151	0.167	0.158	0.19	0.19	0.22	---	---	---	---
